# Supplementary material
Source: PubMed Central journal article supplement (PMC6292793)
Supplement: djy060_supp.pdf [file djy060_supp.pdf]

## **SUPPLEMENTARY FIGURES AND TABLES**

### **Supplementary Figures**

# Supplementary Figure 1

## Distribution of smoking signature

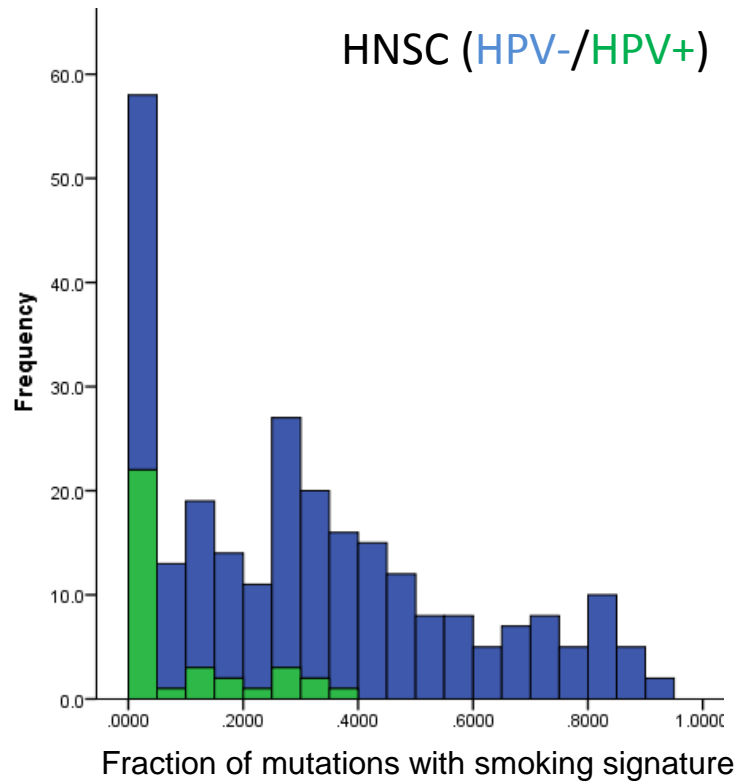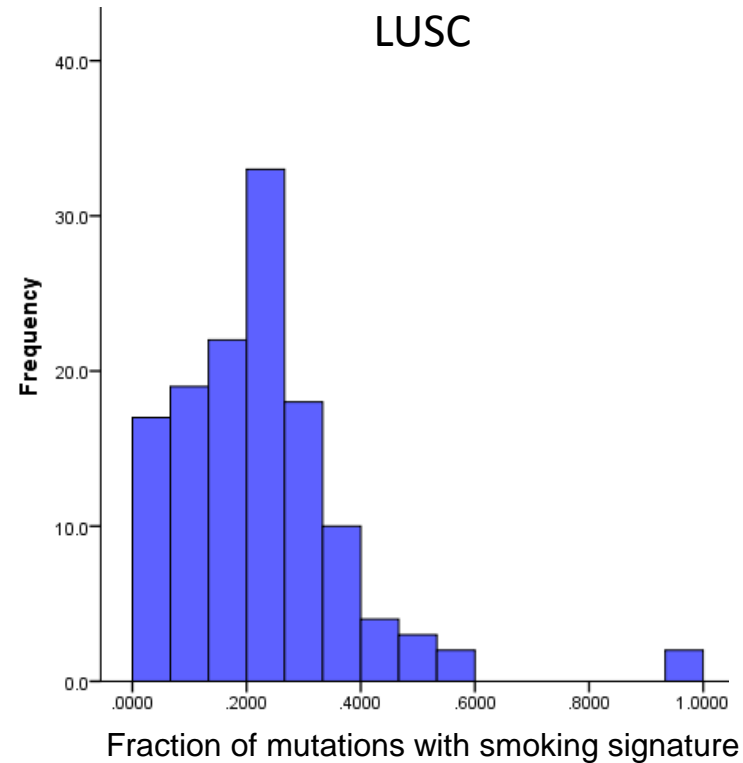

Difference in distributions (HNSC vs LUSC)  
p=.016, Wilcoxon rank-sum test

% of cases with smoking signature > 0 (p=.003, Fisher exact test)

|       |       |
|-------|-------|
| LUSC  | 89.2% |
| HNSC  | 76.7% |
| HPV + | 37.1% |
| HPV - | 84.2% |

**Supplementary Figure 1.** Histogram showing the distribution of the mutational smoking signature (signature 4, as obtained from deconstructsigns), in TCGA HNSC and LUSC samples.

## Supplementary Figure 2

### Clinical smoking history and mutational smoking signature

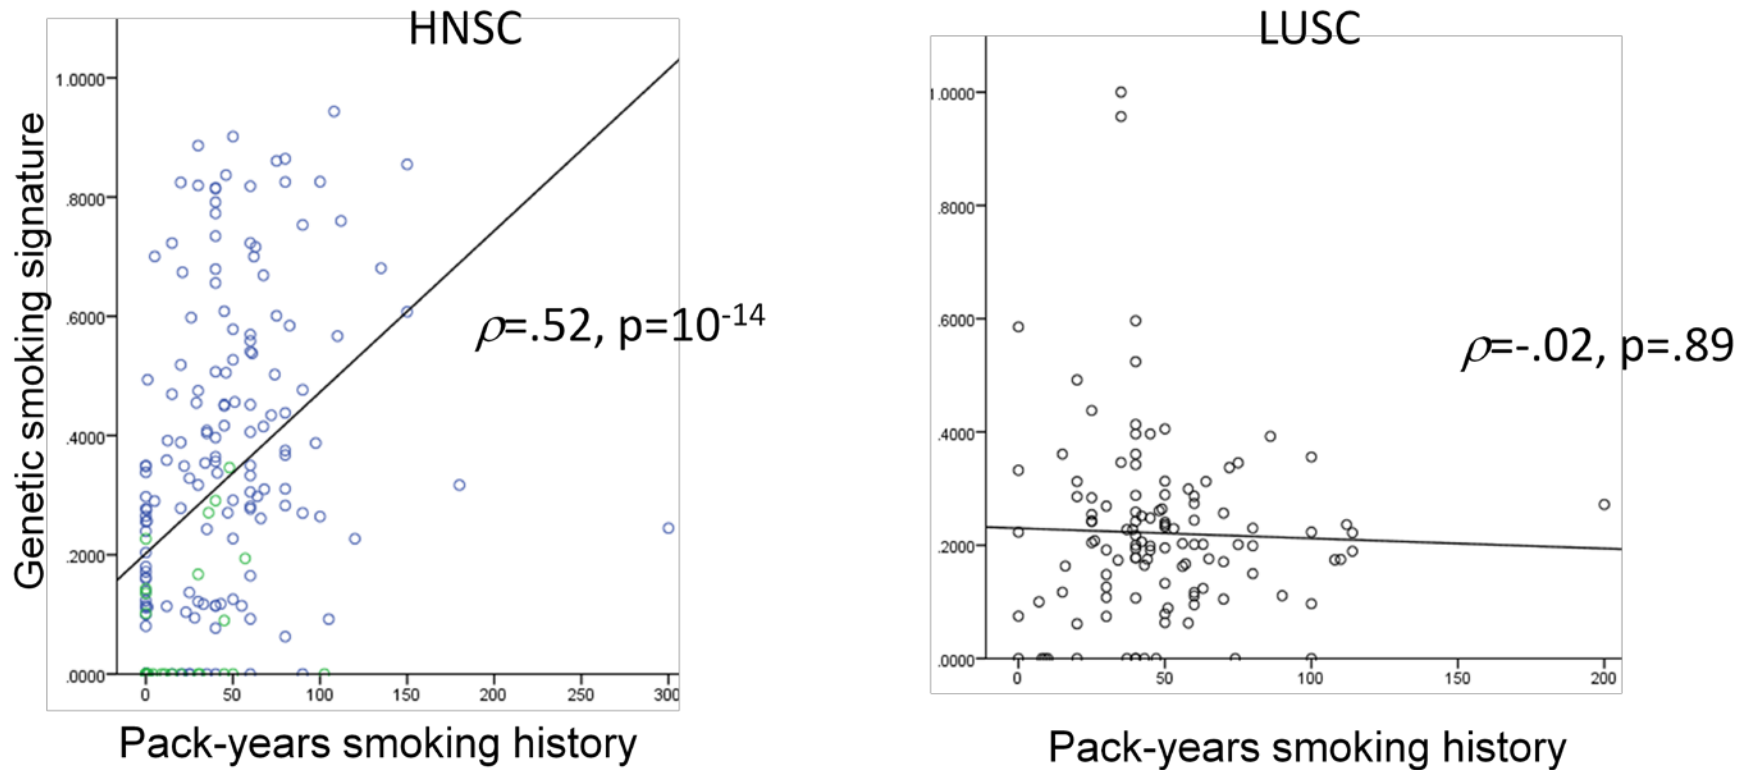

**Supplementary Figure 2.** Association between clinical smoking history (in pack-years, defined as packs per day x years smoking), and the mutational smoking signature. Correlation assessed with non-parametric Spearman's rho, two-tailed.

Supplementary Log mutation count  
Figure 3

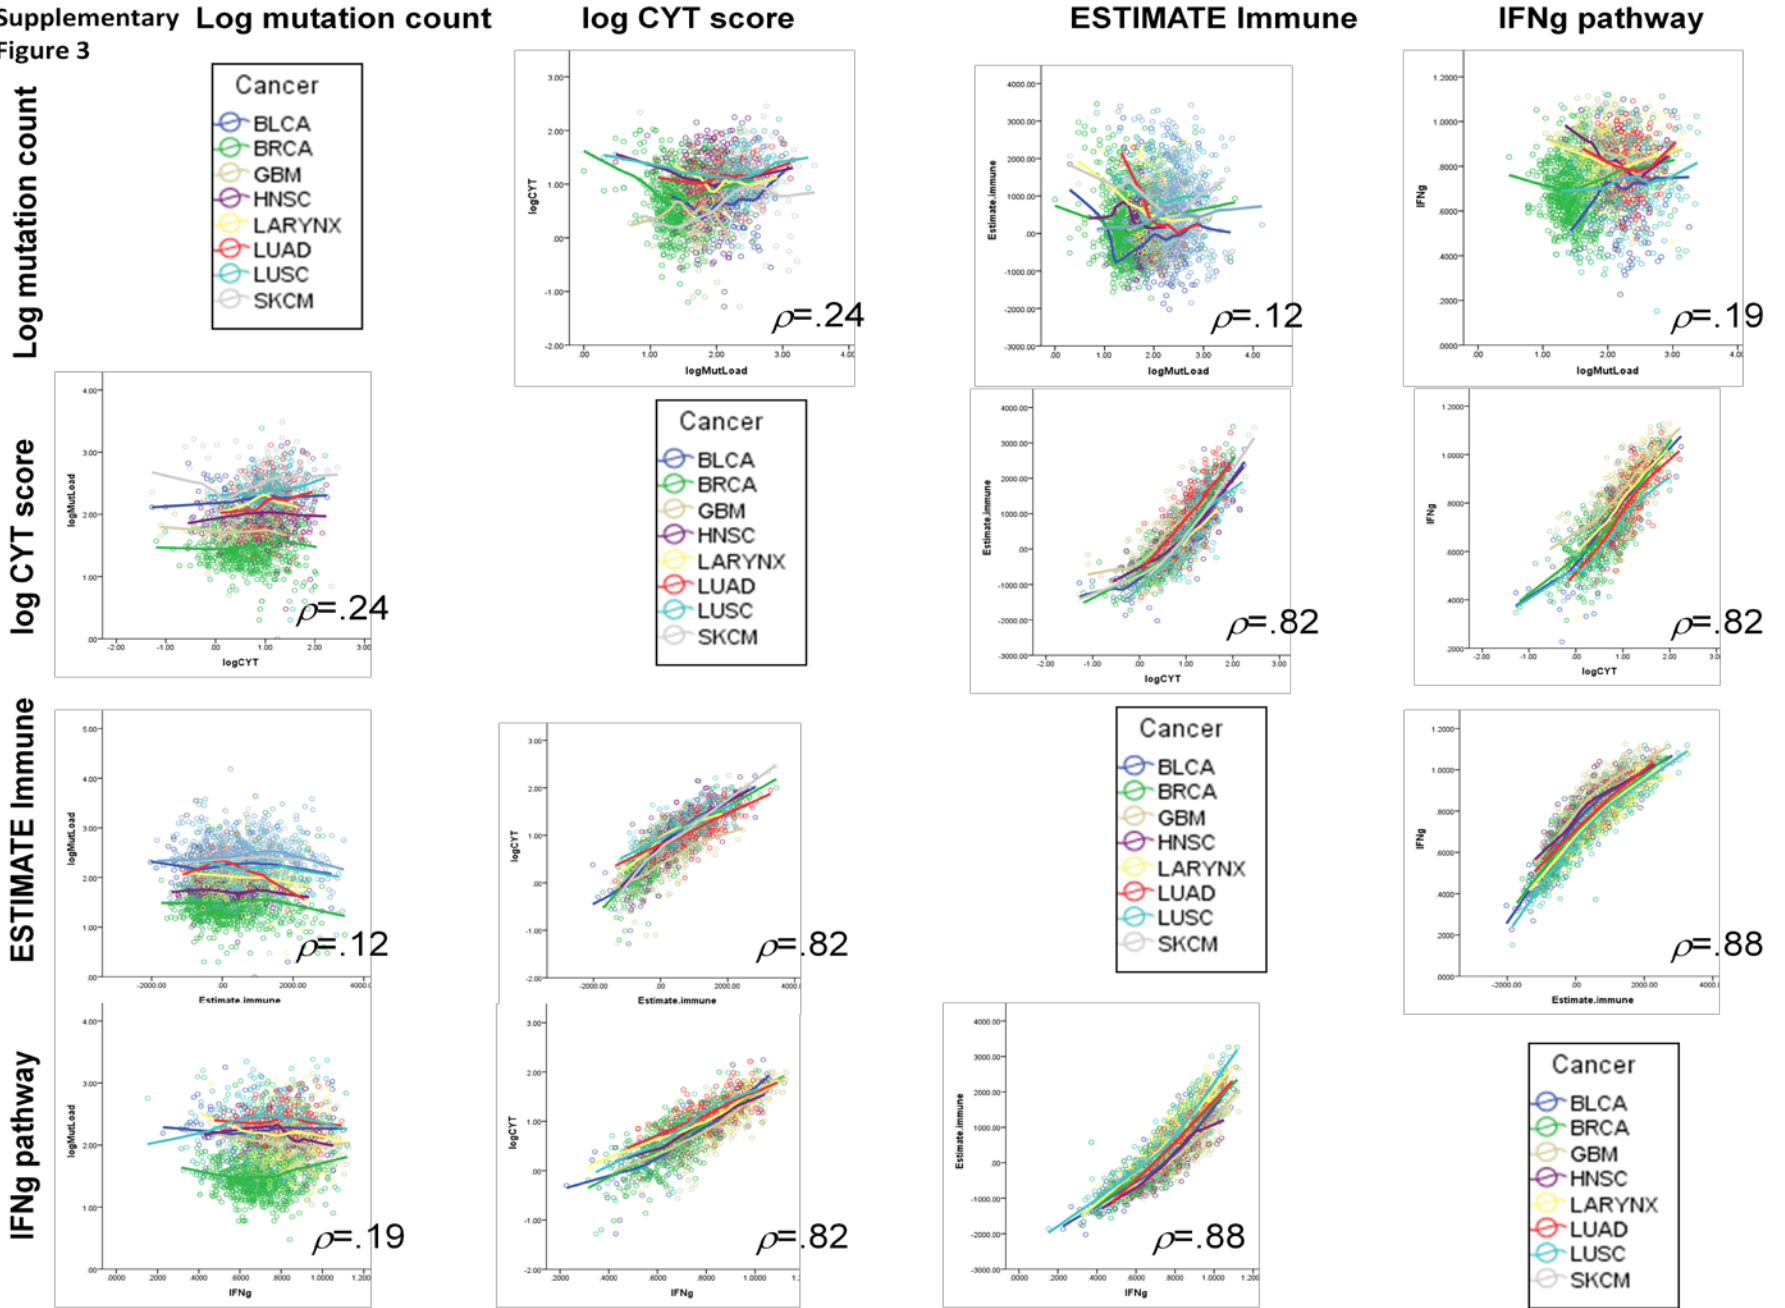

**Supplementary Figure 3.** Correlations between immunogenomic metrics in 8 cancer types, including  $\log_{10}$  (mutation count),  $\log_{10}$  (cytolytic score), ESTIMATE ImmuneScore, and enrichment of the REACTOME IFN $\gamma$  pathway, as described in the Methods. Overall correlations are expressed as Spearman's rho. BLCA, bladder cancer; BRCA, breast cancer; GBM, glioblastoma; HNSC, head and neck squamous cell carcinoma (all subsites); LARYNX, HNSC (larynx tumors only); LUAD, lung adenocarcinoma; LUSC, lung squamous cell carcinoma; SKCM, cutaneous melanoma.

# Supplementary Figure 4

## Mutational load vs. cytolytic score

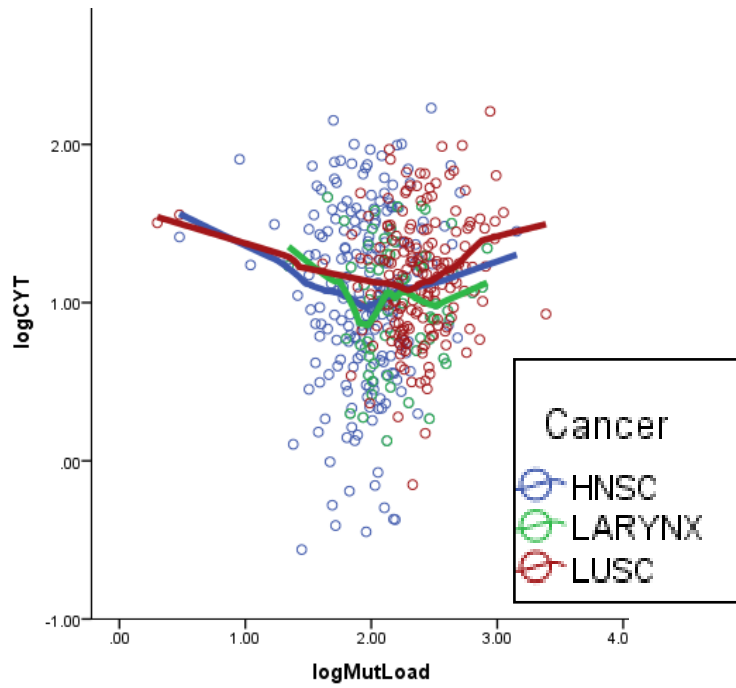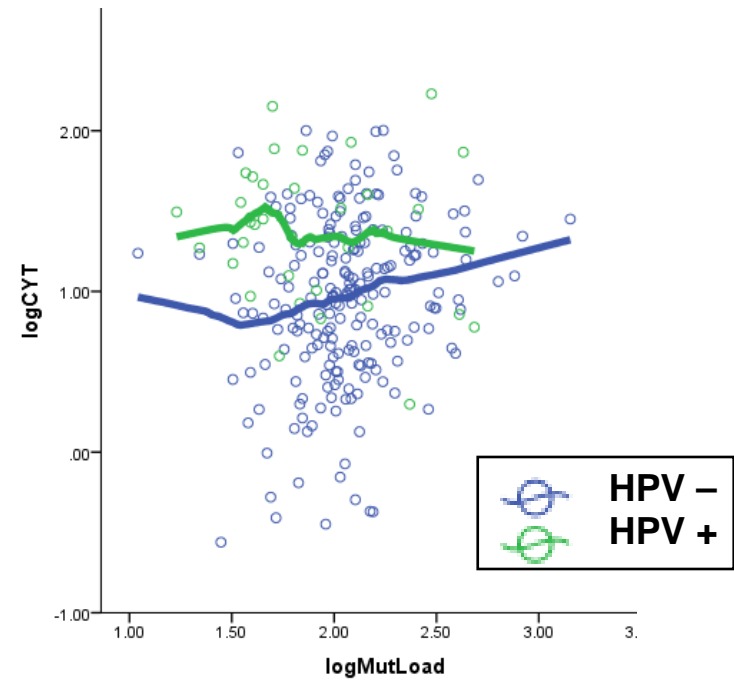

**Supplementary Figure 4.** Scatterplots showing **(left)** mutational load and CYT (cytolytic) score in HNSC (all subsites), HNSC (larynx only), and LUSC, and **(right)** mutational load and CYT score in HPV+ and HPV- HNSC.



## Supplementary Figure 5

### Smoking signature vs. immune metrics, stratified by cancer type

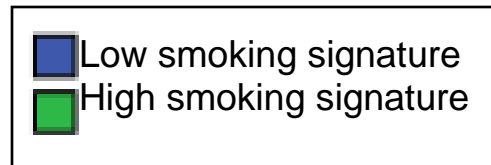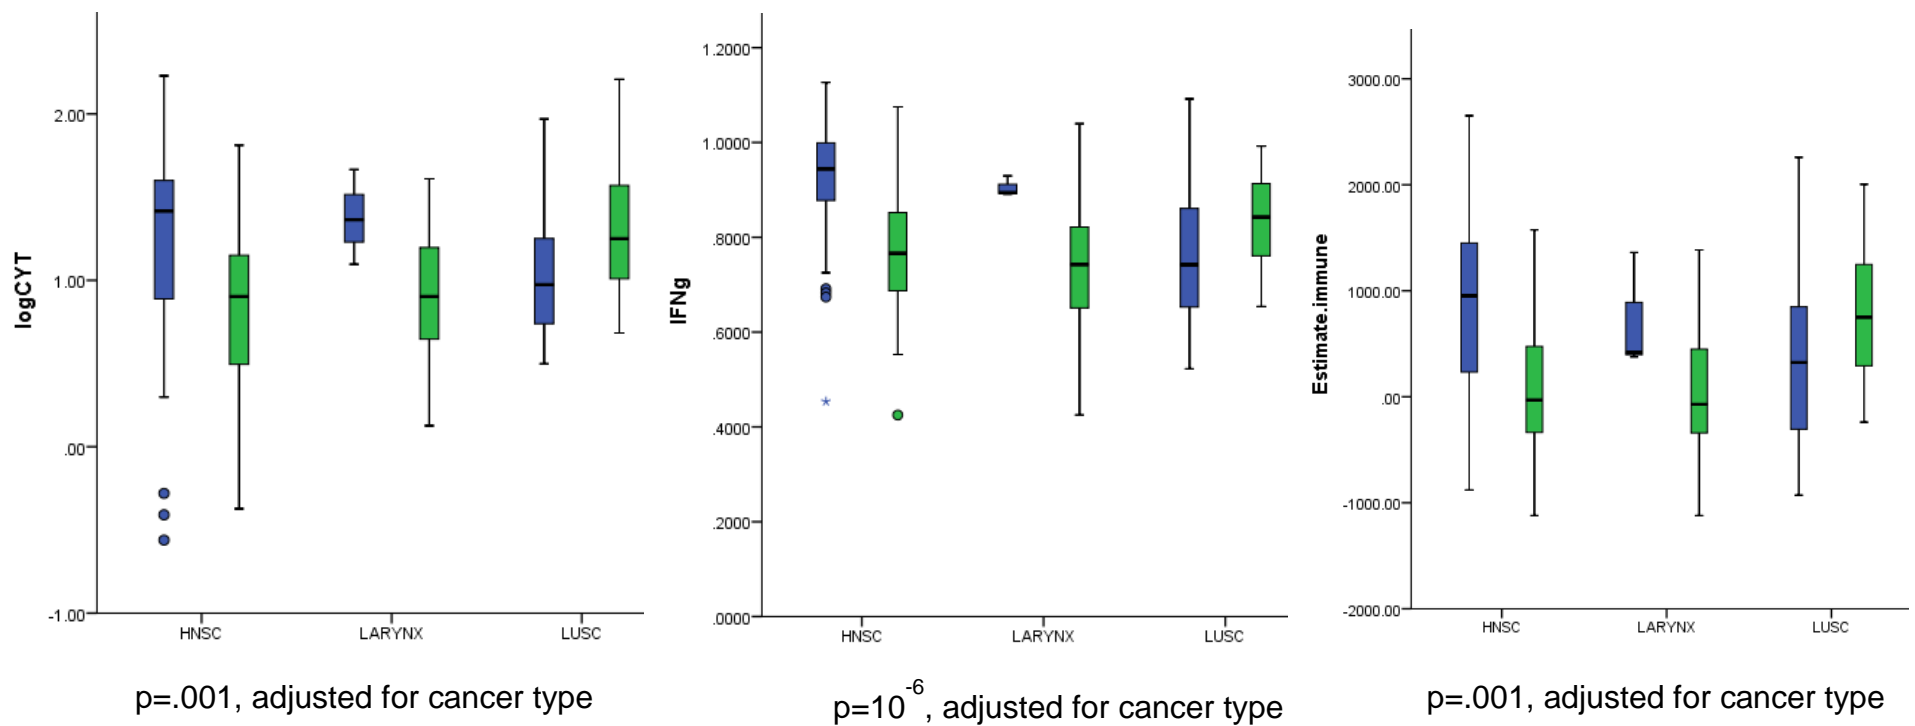

**Supplementary Figure 5.** Boxplots showing immune metrics and in tumors falling in the lowest and highest quartiles of mutational smoking signature, in HNSC (all subsites), HNSC (larynx only), and LUSC. Boxes represent median (horizontal line) and interquartile range, with whiskers representing minima/maxima and outliers being those samples beyond 1.5x

interquartile range. P values represent hypothesis testing for the smoking status independent variable and cancer site covariate with the labeled immune metric dependent variable, in multivariable least-squares regression.

# Supplementary Figure 6

## Smoking signature vs. immune metrics, stratified by HPV status

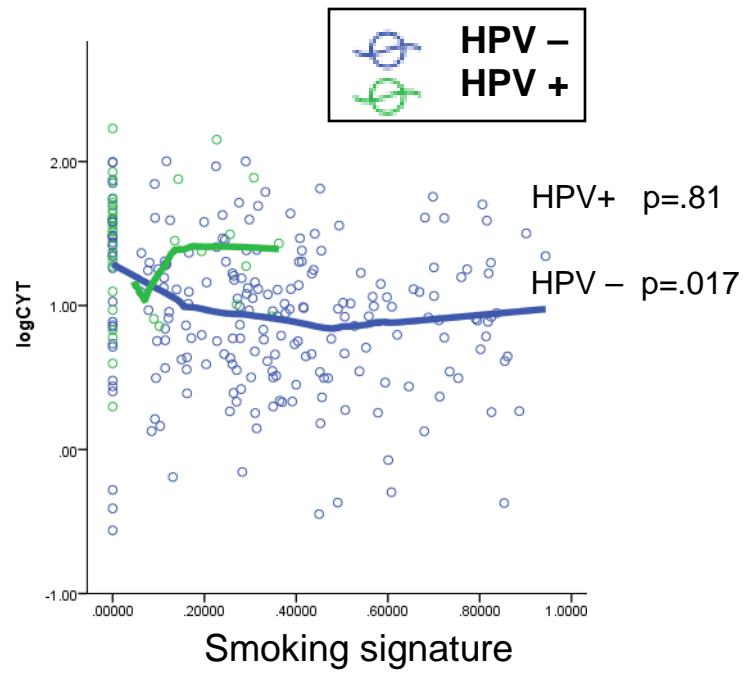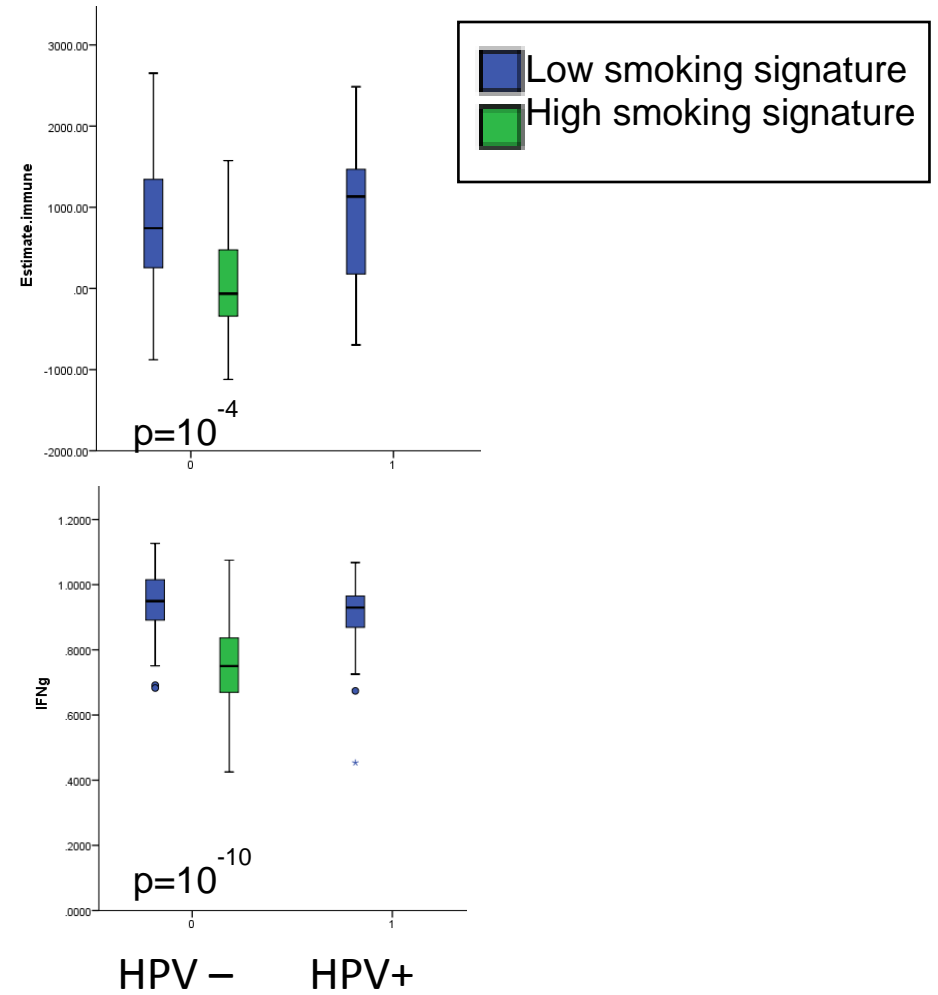

**Supplementary Figure 6.** (Left) scatterplot of mutational smoking signature vs. CYT (cytolytic) score, in HPV+ and HPV-HNSC, where p value represents Spearman correlation. (Right) box plots of smoking status vs. ESTIMATE ImmuneScore and IFNg pathway signaling, stratified by HPV status, where p value represents t-test. There were no HPV+ tumors with high smoking signature. HNSC, head and neck squamous cell carcinoma; HPV, human papillomavirus.

## Supplementary Figure 7

### Smoking signature vs. immune metrics, stratified by HN subsite

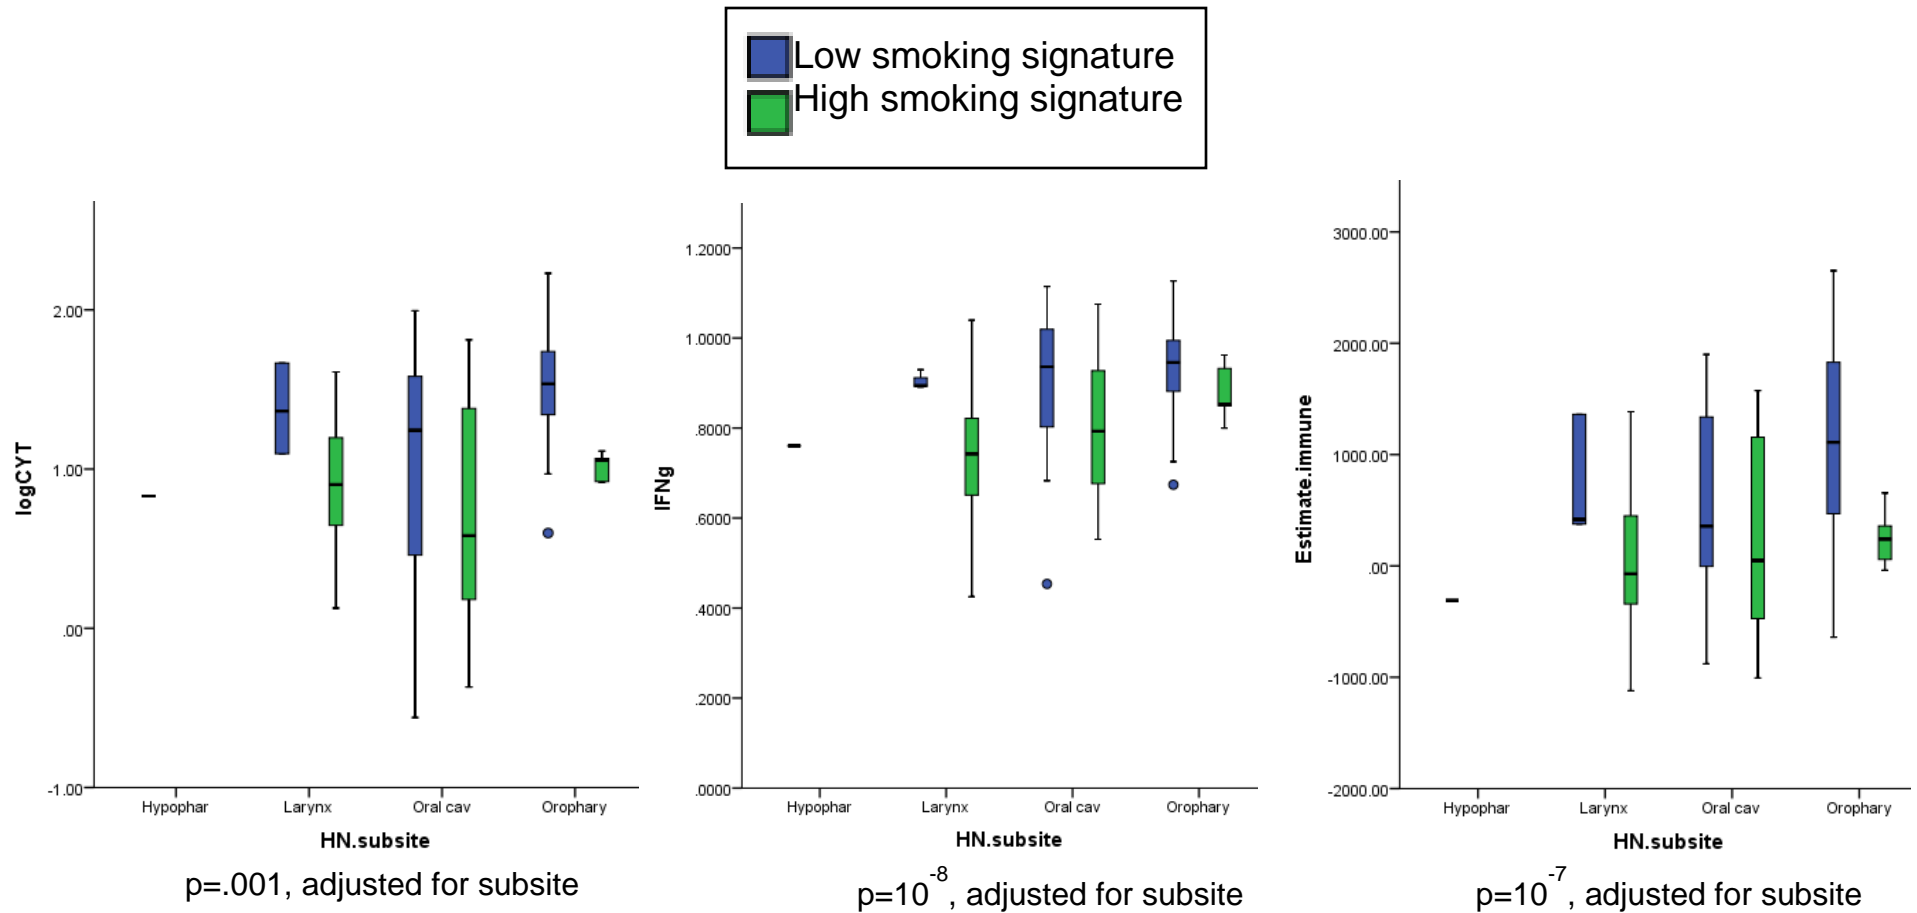

**Supplementary Figure 7.** Boxplots showing immune metrics in smoking-low and smoking-high HNSC tumors, stratified by anatomic subsite. P values represent hypothesis testing for the smoking status independent variable and subsite covariate with the labeled immune metric dependent variable, in multivariable least-squares regression, demonstrating that smoking is associated with an immunosuppressive phenotype across all head and neck anatomic subsites.

# Supplementary Figure 8

## Prior radiation therapy vs. immune metrics, stratified by HN subsite

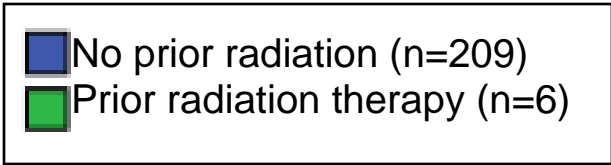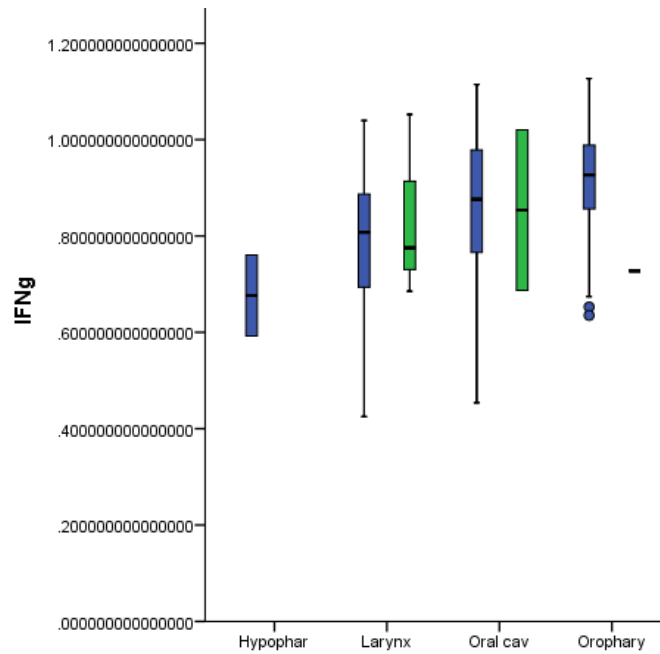

p=.66

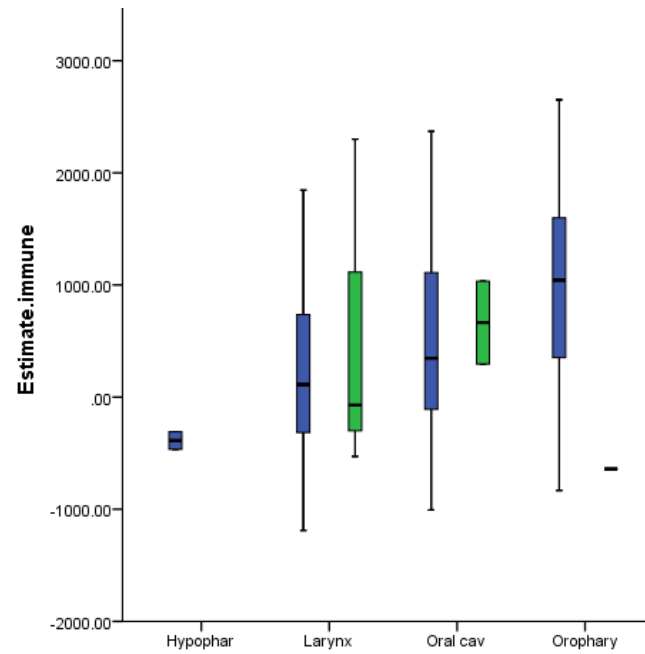

p=.77

**Supplementary Figure 8.** Boxplots showing immune metrics in HNSC tumors stratified by prior radiation therapy. P values represent hypothesis testing for the radiation therapy independent variable and subsite covariate with the labeled immune metric dependent variable, in multivariable least-squares regression. Insufficient number of patients with prior radiotherapy had CYT scores available.

# Supplementary Figure 9

## ESTIMATE Immune Score and clinical smoking history HNSC (independent expression dataset)

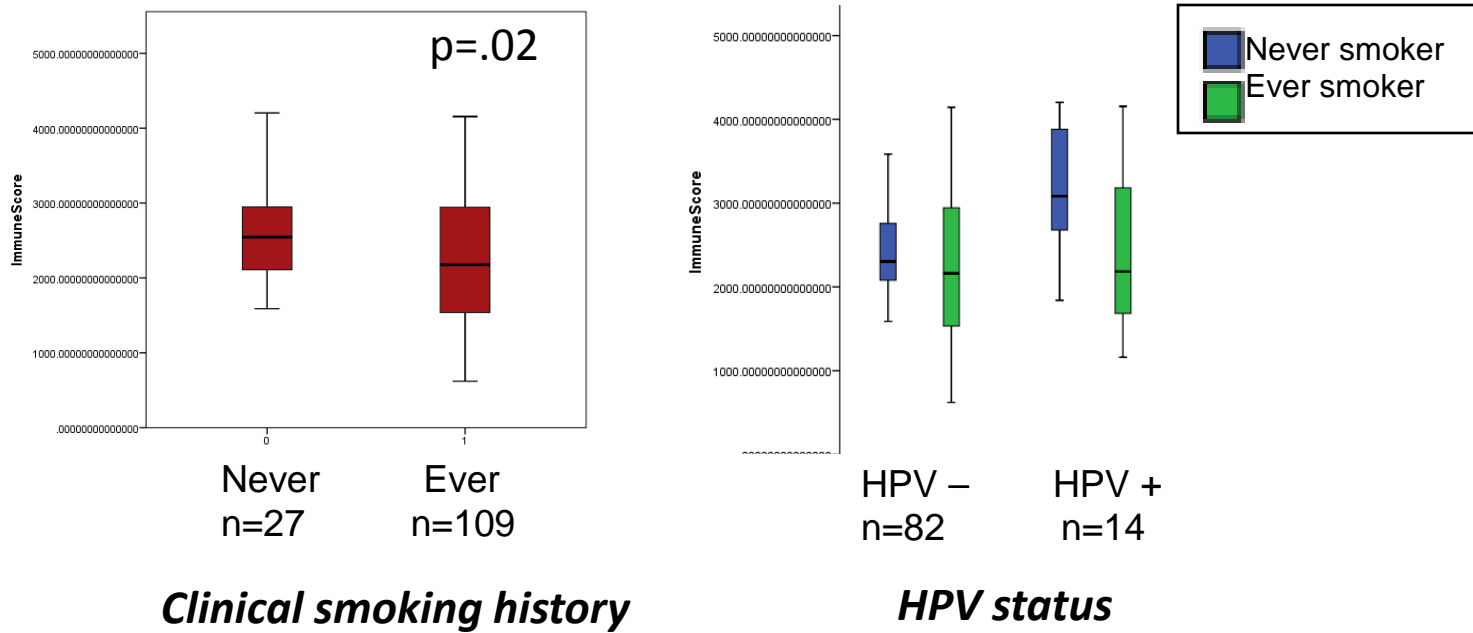

Dataset of Walter et al, PLoS One 2013; PMID 23451093



**Supplementary Figure 9.** Boxplots showing immune infiltration and clinical smoking history in external HNSC expression dataset of Walter et al (n=138; 136 with smoking history, and 96 with HPV status available) (1), with hypothesis testing performed with single-tailed t-test.

## Supplementary Figure 10

### ESTIMATE Immune Score and clinical smoking history Lung SCC (independent expression dataset)

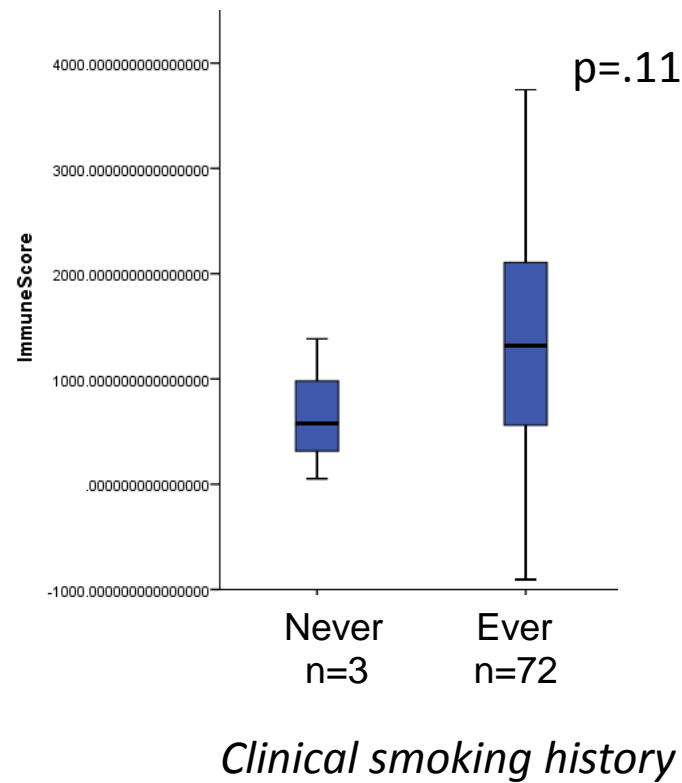

Dataset of Lee et al, Clin Canc Res 2008; PMID 19010856

**Supplementary Figure 10.** Boxplots showing immune infiltration and clinical smoking history in external LUSC expression dataset of Lee et al (n=75) (2), with hypothesis testing performed with single-tailed t-test.

## Supplementary Figure 11

### Differentially expressed genes in smoking signature-high and smoking signature-low HNSC and LUSC tumors

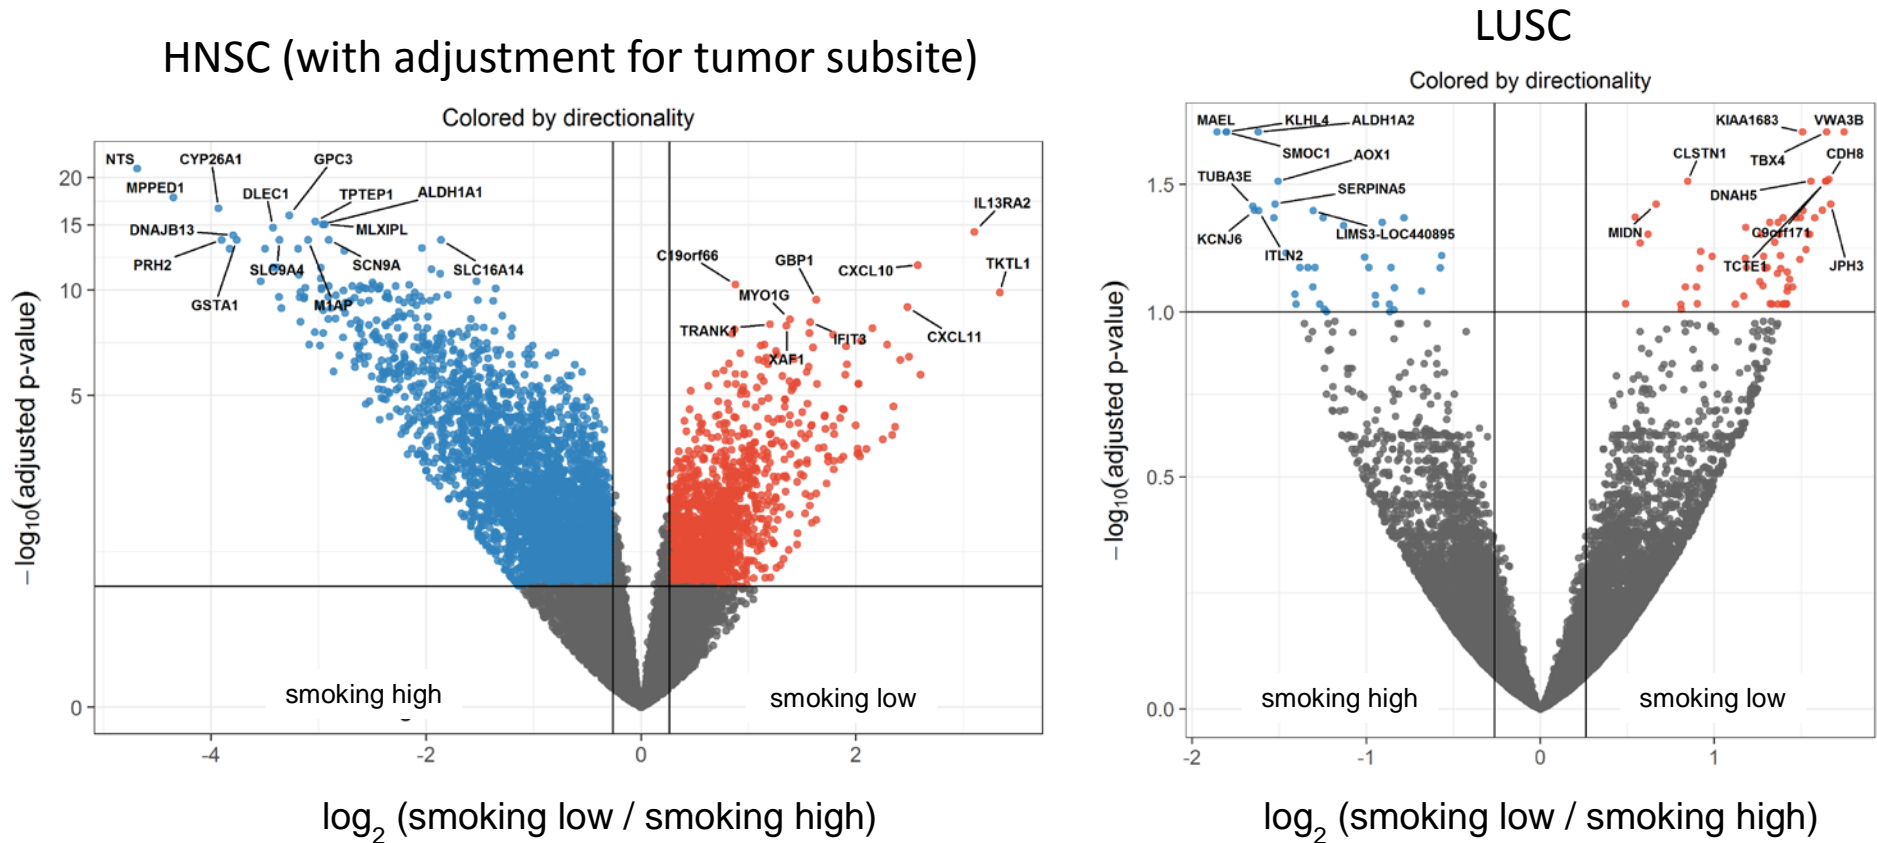

**Supplementary Figure 11.** Volcano plots of differentially expressed genes (DEGs) in smoking-low vs. smoking-high HNSC and LUSC. DEGs were identified in DESeq as described in the Methods, with HNSC analysis limited to HPV-negative cases only and including anatomic subsite as a covariate. DEGs are plotted with those upregulated in smoking-high tumors on the left, and those upregulated in smoking-low tumors (ie, downregulated in smoking-high tumors) on the right, with  $\log_2$  fold change on the x-axis, and  $-\log_{10}$  p-value on the y-axis.

## Supplementary Figure 12.

### Differentially expressed genes in smoking-high and smoking-low HNSC and LUSC.

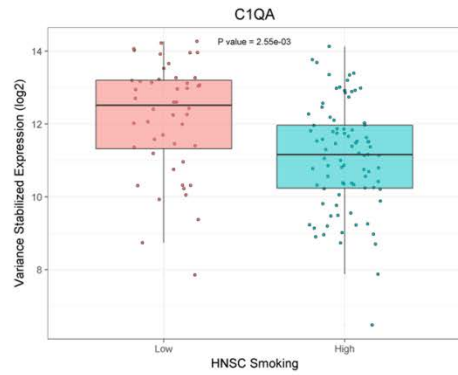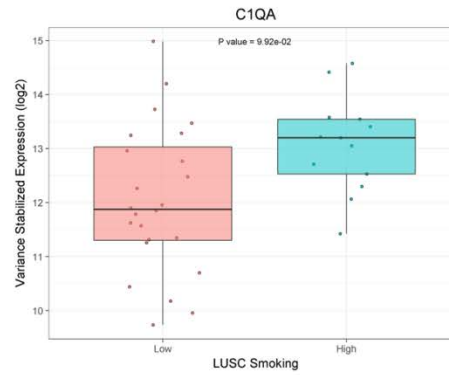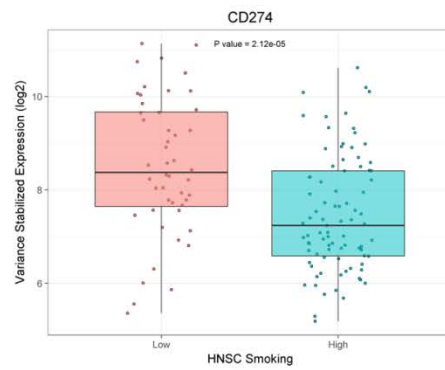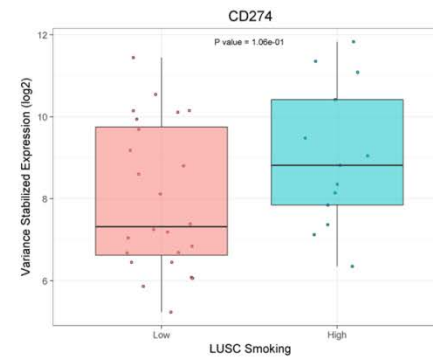

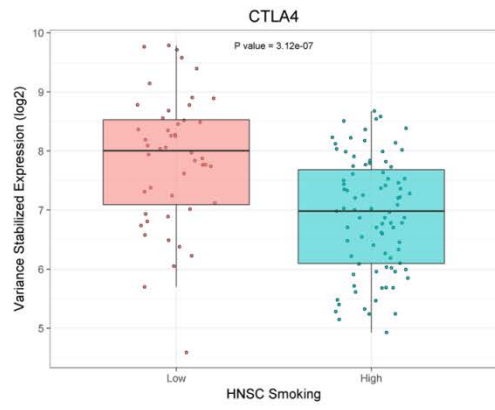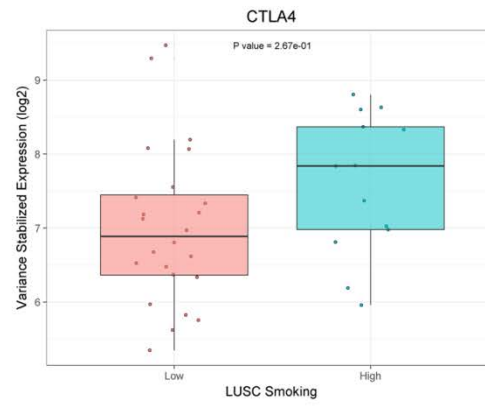

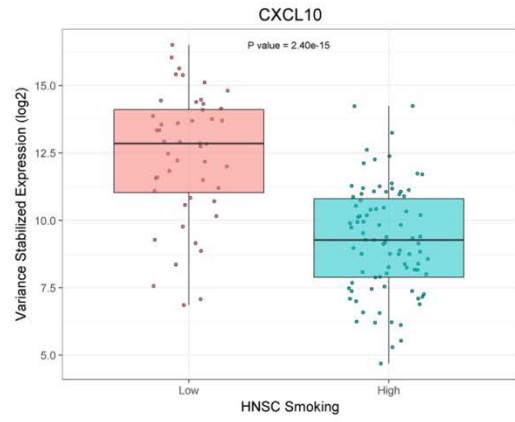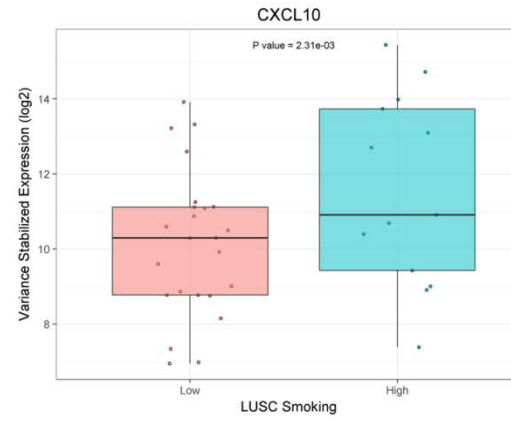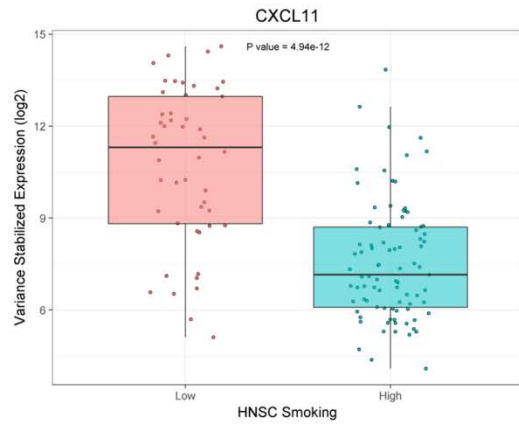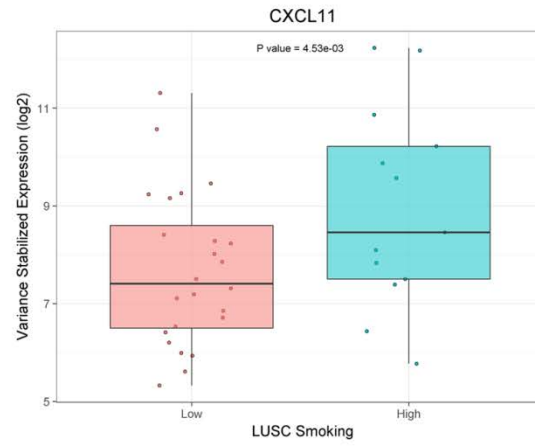

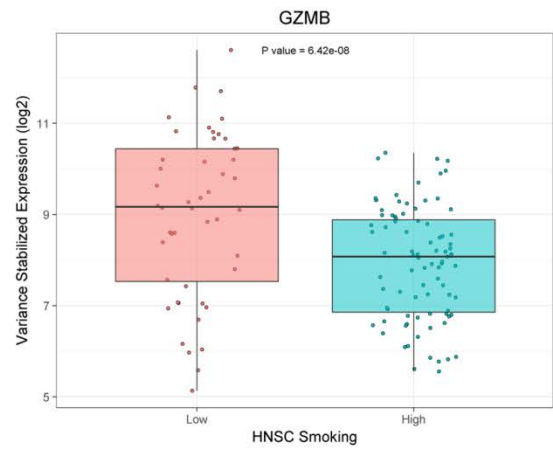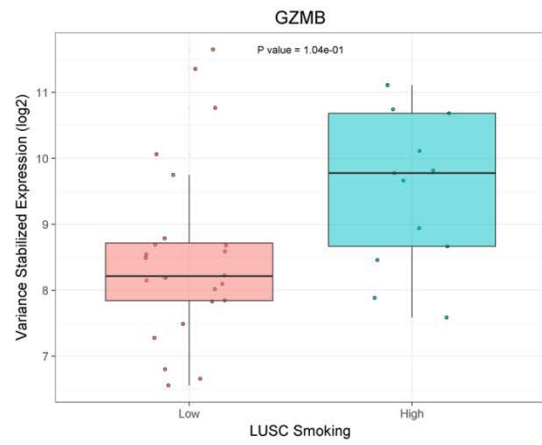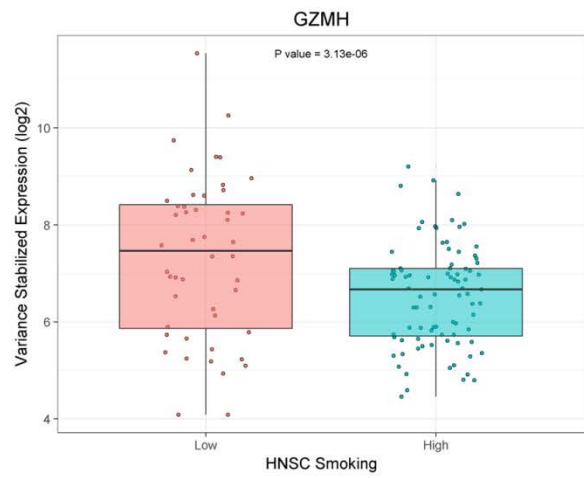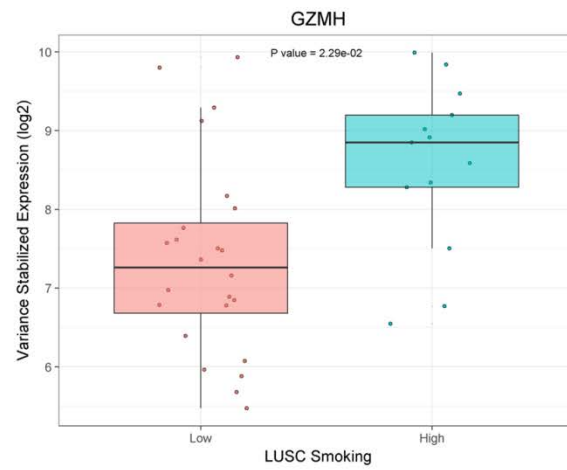



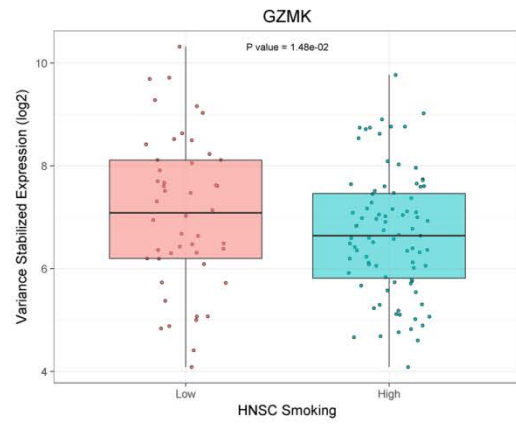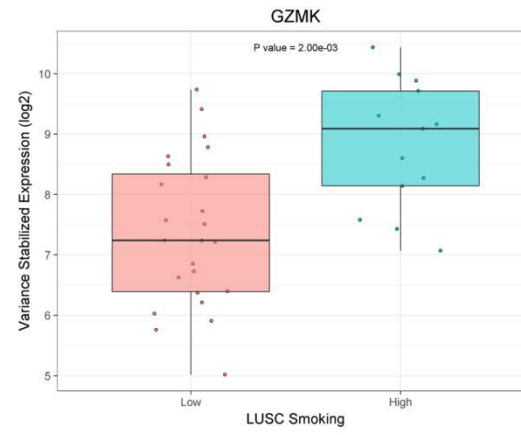

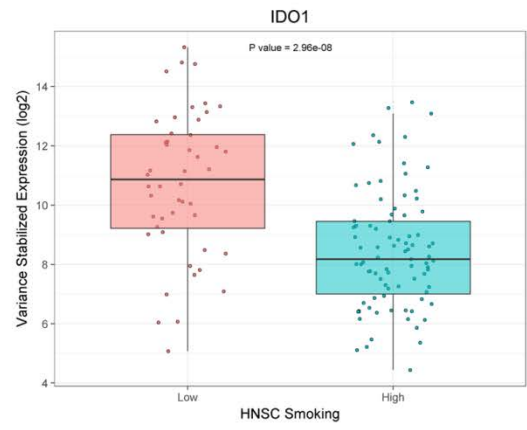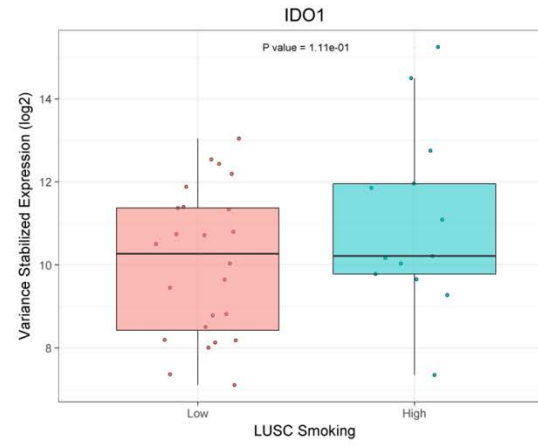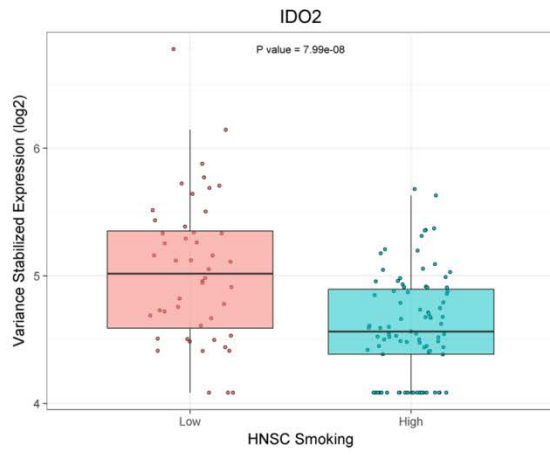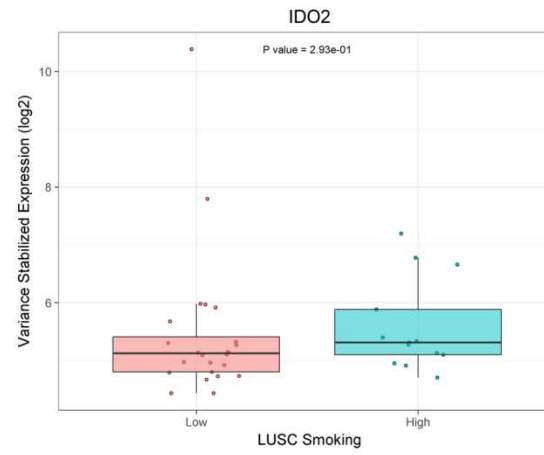

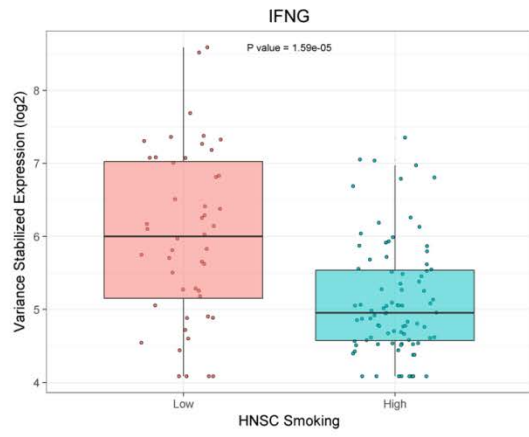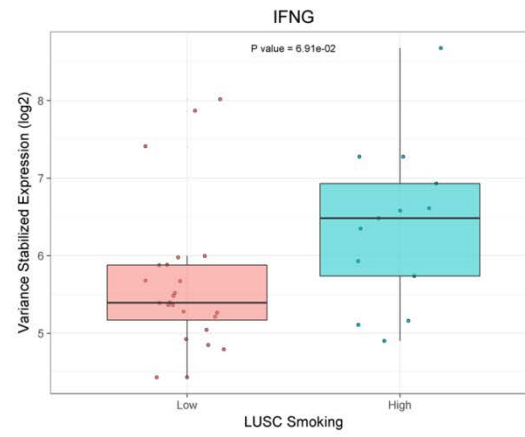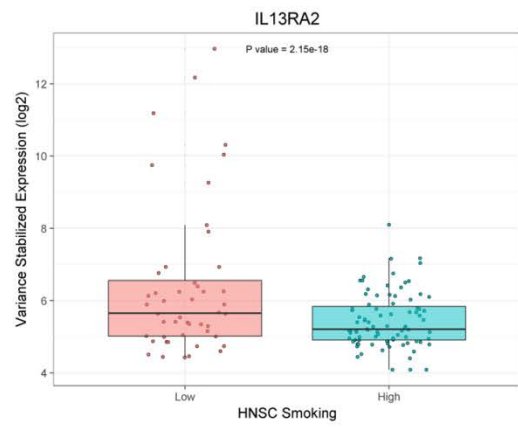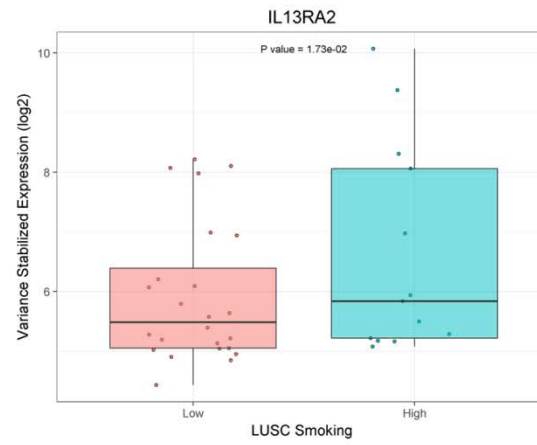

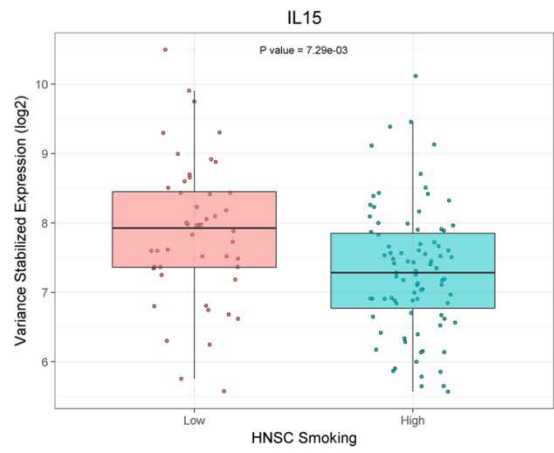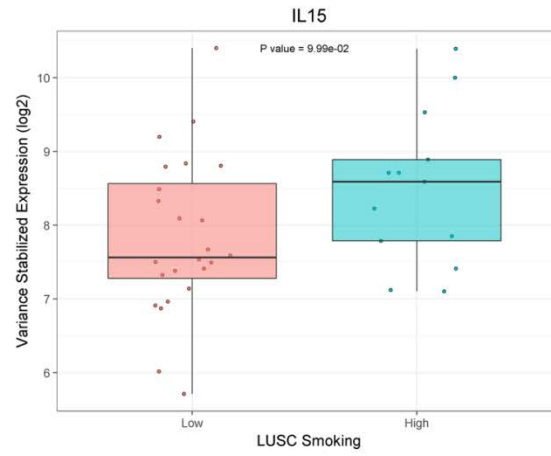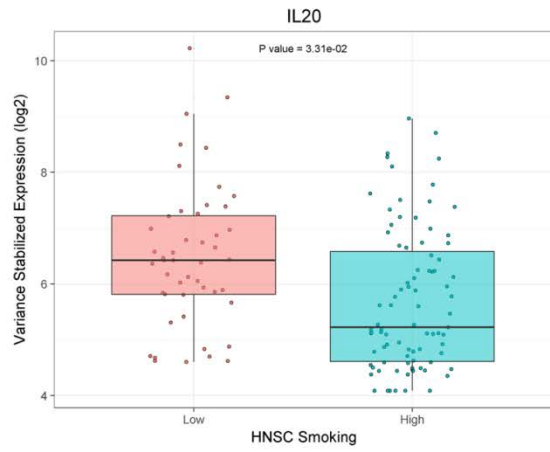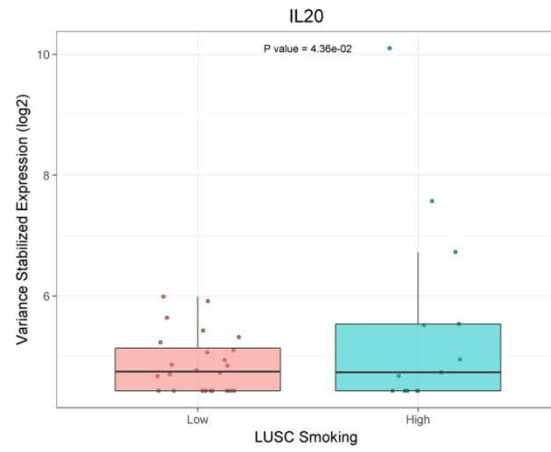

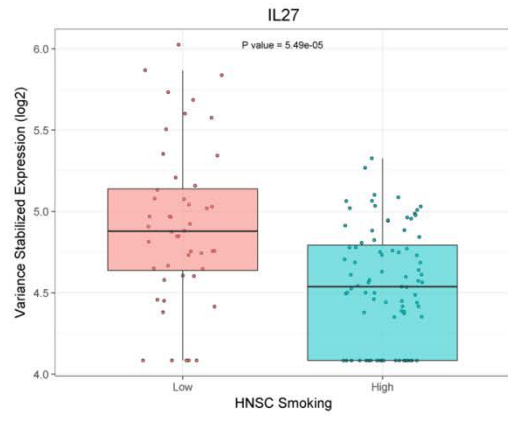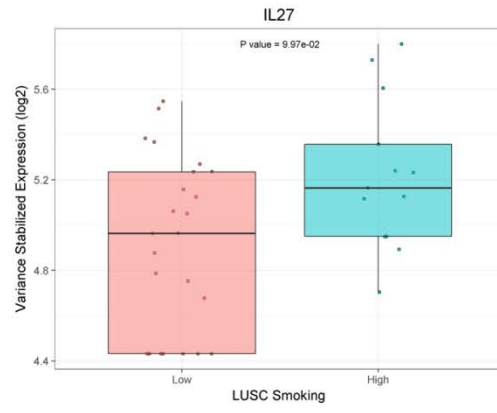

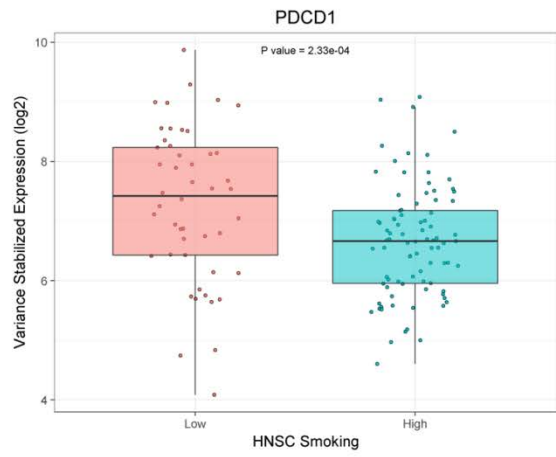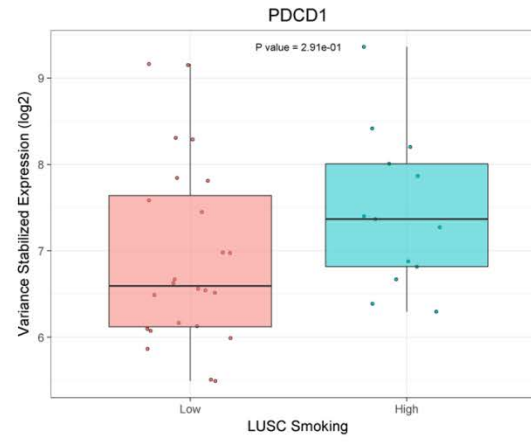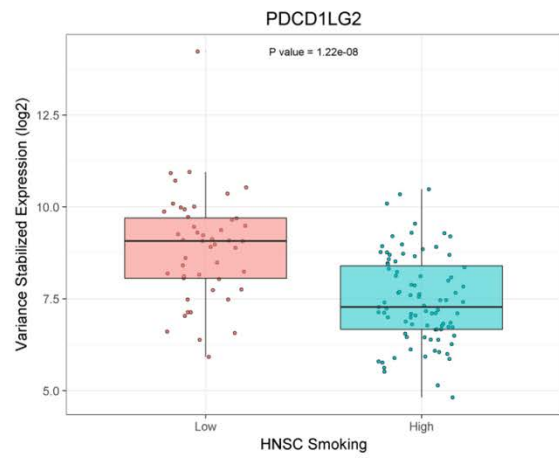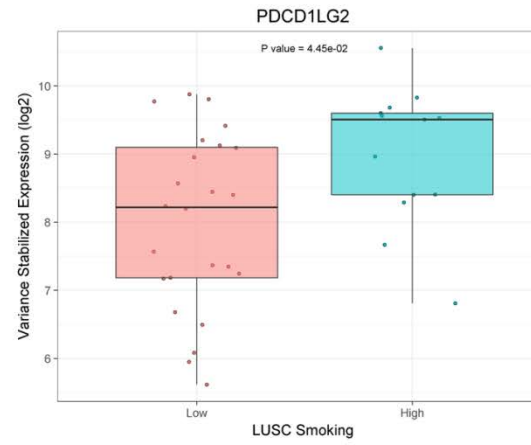

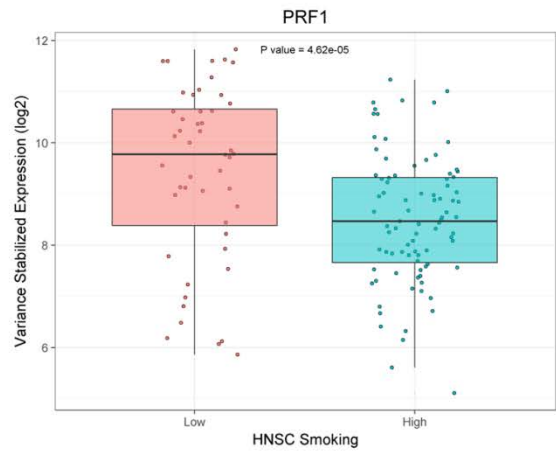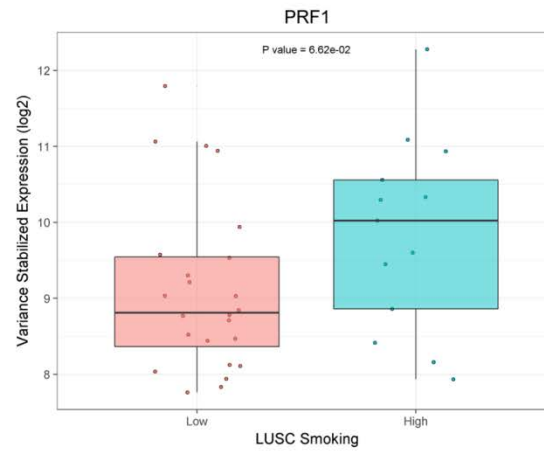

**Supplementary Figure 12.** Boxplots showing immune genes differentially expressed, with opposite directionality, in HNSC vs. LUSC. Each row represents the indicated gene in HNSC (HPV-negative only) (left) and LUSC (right), stratified by smoking status, with nominal p-value displayed at the top of the graph.

## Supplementary Tables

### Supplementary Table 1.

#### Summary of genetic smoking signature (Signature 4) in head and neck and lung squamous cell carcinomas\*

| <u>Variable</u>                                                              | <u>HNSC (all)</u>  | <u>HNSC (HPV- only)</u> | <u>LUSC</u>   |                    |                    |              |
|------------------------------------------------------------------------------|--------------------|-------------------------|---------------|--------------------|--------------------|--------------|
| Total patients with tobacco signature data                                   | 287                | 228                     | 130           |                    |                    |              |
| Mean (median) followup time, days                                            | 847 (536)          | 808 (499)               | 939 (686)     |                    |                    |              |
| Mean (SD) tobacco signature                                                  | .30 (.26)          | .34 (.26)               | .22 (.16)     |                    |                    |              |
| Patients with low tobacco signature                                          | 81 (28%)           | 48 (21%)                | 24 (18%)      |                    |                    |              |
| Mean (SD) tobacco signature                                                  | .014 (.03)         | .021 (.037)             | .033 (.04)    |                    |                    |              |
| Patients with high tobacco signature                                         | 91 (32%)           | 87 (38%)                | 13 (10%)      |                    |                    |              |
| Mean (SD) tobacco signature                                                  | .61 (.16)          | .61 (.16)               | .55 (.20)     |                    |                    |              |
| <u>HNSCC (with available smoking signature, known HPV and subsite statu:</u> | <u>Oral cavity</u> | <u>Oropharynx</u>       | <u>Larynx</u> | <u>Hypopharynx</u> | <u>Overlapping</u> | <u>Total</u> |
| HPV-negative                                                                 | 85                 | 14                      | 71            | 1                  | 57                 | 228          |
| HPV-positive                                                                 | 8                  | 20                      | 1             | 1                  | 5                  | 35           |
| Total                                                                        | 93                 | 34                      | 72            | 2                  | 62                 | 263          |

\*Summary of genetic smoking signature (Signature 4) in head and neck and lung squamous cell carcinomas, expressed as mean with SD (standard deviation), and summary of distribution of HPV+ and HPV- HNSC by anatomic subsite. Not included in lower table: 24 HNSC cases with unknown HPV status and anatomic subsite. HNSC, head and neck squamous cell carcinoma. LUSC, lung squamous cell carcinoma. HPV, human papillomavirus.



**Supplementary Table 2.** Complete HNSC data, including TCGA ID, clinical, mutational smoking signature, and other immunogenomic metrics.

*Available for separate download.*

**Supplementary Table 3.** Complete LUSC data, including TCGA ID, clinical, mutational smoking signature, and other immunogenomic metrics.

*Available for separate download.*

**Supplementary Table 4. Cox regression models of overall survival in HNSC and LUSC, including mutational smoking signature (categorical or continuous), and other covariates.**

| Covariate                                                                  | HR   | 95%CI     | P value*                |
|----------------------------------------------------------------------------|------|-----------|-------------------------|
| HNSC                                                                       |      |           |                         |
| Model with smoking signature alone                                         |      |           |                         |
| Smoking Signature (High vs Low)                                            | 1.50 | 1.23-1.81 | 3.30x10 <sup>-6</sup>   |
| Model with smoking signature and HPV status                                |      |           |                         |
| Smoking Signature (High vs Low)                                            | 1.35 | 1.11-1.65 | 0.003                   |
| HPV+                                                                       | 0.26 | 0.06-1.13 | 0.07                    |
| Model with smoking signature, HPV status, and radiation treatment          |      |           |                         |
| Smoking Signature (High vs Low)                                            | 1.35 | 1.11-1.65 | 0.003                   |
| HPV+                                                                       | 0.77 | 0.43-1.40 | 0.41                    |
| Adjuvant radiotherapy                                                      | 0.40 | 0.06-1.18 | 0.08                    |
| LUSC                                                                       |      |           |                         |
| Model with smoking signature alone                                         |      |           |                         |
| Smoking Signature (High vs Low)                                            | 1.02 | 0.71-1.46 | 0.92                    |
| Model excluding 4 patients receiving adjuvant chemotherapy or radiotherapy |      |           |                         |
| Smoking Signature (High vs Low)                                            | 0.83 | 0.28-2.45 | 0.73                    |
| HNSC and LUSC combined model, with interaction term                        |      |           |                         |
| Smoking Signature (High vs Low)                                            | 1.47 | 1.26-1.72 | 5.12 x 10 <sup>-5</sup> |
| Cancer type (LUSC vs HNSC)                                                 | 2.53 | 1.10-6.46 | 0.10                    |
| Interaction (cancer type x smoking)                                        | 0.68 | 0.48-0.96 | 0.03                    |
| Alternative models including smoking signature as a continuous variable    |      |           |                         |
| HNSC                                                                       |      |           |                         |
| Smoking signature (continuous)                                             | 2.50 | 1.31-4.78 | 0.006                   |

|                                                                           |      |           |       |
|---------------------------------------------------------------------------|------|-----------|-------|
| LUSC                                                                      |      |           |       |
| Smoking signature(continuous)                                             | 1.3  | 0.26-6.44 | 0.75  |
| Smoking signature as a continuous variable, adjusted for adjuvant therapy |      |           |       |
| HNSC                                                                      |      |           |       |
| Smoking signature (continuous)                                            | 2.42 | 1.26-4.64 | 0.008 |
| Adjuvant radiation therapy                                                | 0.68 | 0.44-1.06 | 0.09  |
| LUSC                                                                      |      |           |       |
| Smoking signature (continuous)                                            | 1.01 | 0.19-5.40 | 0.99  |
| Adjuvant radiation therapy                                                | 1.77 | 0.42-7.38 | 0.43  |
| Adjuvant chemotherapy                                                     | 0.44 | 0.14-1.45 | 0.18  |

---

\*2-tailed Wald statistic in Cox regression model

HNSC, head and neck squamous cell carcinoma

LUSC, lung squamous cell carcinoma

**Supplementary Table 5.** Correlations of the genetic smoking signature with other immunogenomic metrics.

|                                            | Spearman rho | P value*               |
|--------------------------------------------|--------------|------------------------|
| log (mutation count) vs smoking signature  |              |                        |
| HNSCC (all)                                | 0.33         | $1.01 \times 10^{-7}$  |
| Larynx SCC                                 | 0.68         | $6.22 \times 10^{-10}$ |
| Lung SCC                                   | 0.49         | $2.80 \times 10^{-9}$  |
| log (CYT score) vs smoking signature       |              |                        |
| HNSCC (all)                                | -0.28        | $4.07 \times 10^{-6}$  |
| Larynx SCC                                 | -0.15        | 0.22                   |
| Lung SCC                                   | 0.20         | 0.02                   |
| IFNg pathway vs smoking signature          |              |                        |
| HNSCC (all)                                | -0.39        | $3.20 \times 10^{-11}$ |
| Larynx SCC                                 | -0.38        | 0.001                  |
| Lung SCC                                   | 0.18         | 0.047                  |
| ESTIMATE Immune Score vs smoking signature |              |                        |
| HNSCC (all)                                | -0.37        | $1.29 \times 10^{-10}$ |
| Larynx SCC                                 | -0.29        | 0.01                   |
| Lung SCC                                   | 0.19         | 0.03                   |

With adjustment for tumor  
purity<sup>†</sup>

|              | Standardized beta | P value* |
|--------------|-------------------|----------|
| HNSC         |                   |          |
| Immune Score | -0.27             | <.001    |
| ASCAT purity | 0.042             | 0.54     |
| HPV          | -0.29             | <.001    |
| LUSC         |                   |          |
| Immune Score | 0.2               | 0.05     |
| ASCAT purity | 0.01              | 0.92     |

Somatic alterations vs. immune metrics

| Cancer Type / Gene |               | ESTIMATE Immune Score | P value <sup>‡</sup> |
|--------------------|---------------|-----------------------|----------------------|
| HNSC               |               |                       |                      |
|                    | <i>TP53</i>   | wild-type             | 624                  |
|                    |               | mutated               | 337                  |
|                    | <i>PIK3CA</i> | wild-type             | 462                  |
|                    |               | mutated               | 468                  |
|                    | <i>CASP8</i>  | wild-type             | 443                  |
|                    |               | mutated               | 820                  |
|                    | <i>CDKN2A</i> | wild-type             | 780                  |
|                    |               | mutated               | 815                  |
|                    | <i>NOTCH1</i> | wild-type             | 453                  |
|                    |               | mutated               | 537                  |
|                    | <i>FAT1</i>   | wild-type             | 460                  |
|                    |               | mutated               | 483                  |

|               |           |     |       |
|---------------|-----------|-----|-------|
| <i>HLA-A</i>  | wild-type | 455 | p=.22 |
|               | mutated   | 815 |       |
| <i>B2M</i>    | wild-type | 469 | p=.40 |
|               | mutated   | 170 |       |
| <i>HRAS</i>   | wild-type | 459 | p=.60 |
|               | mutated   | 668 |       |
| <i>NFE2L2</i> | wild-type | 479 | p=.10 |
|               | mutated   | 151 |       |
| <i>FBXW7</i>  | wild-type | 790 | p=.07 |
|               | mutated   | 584 |       |

LUSC

|               |           |      |       |
|---------------|-----------|------|-------|
| <i>TP53</i>   | wild-type | 360  | p=.38 |
|               | mutated   | 626  |       |
| <i>PIK3CA</i> | wild-type | 606  | p=.70 |
|               | mutated   | 538  |       |
| <i>KEAP1</i>  | wild-type | 676  | p=.05 |
|               | mutated   | 196  |       |
| <i>PTEN</i>   | wild-type | 602  | p=.82 |
|               | mutated   | 652  |       |
| <i>NFE2L2</i> | wild-type | 625  | p=.56 |
|               | mutated   | 531  |       |
| <i>NOTCH1</i> | wild-type | 641  | p=.21 |
|               | mutated   | 199  |       |
| <i>HLA-A</i>  | wild-type | 615  | p=.98 |
|               | mutated   | 624  |       |
| <i>CDKN2A</i> | wild-type | 646  | p=.16 |
|               | mutated   | 431  |       |
| <i>CDKN2A</i> | normal    | 542  | p=.04 |
|               | deletion  | 801  |       |
| <i>CASP8</i>  | wild-type | 594  | p=.04 |
|               | mutated   | 1574 |       |

\* two-tailed significance of Spearman correlation

† Linear regression model for tobacco signature, including ESTIMATE Immune Score, ASCAT purity, and HNSC HPV Status as covariates.

‡ two-tailed independent samples t-test, comparing mutated vs. wild-type

**Supplementary Table 6.** List of differentially expressed genes in HNSC (HPV-negative cases only), comparing smoking-low to smoking-high tumors with FDR-adjusted p-value <.1. A positive fold change indicates upregulation in smoking-low tumors. HNSC tumor subsite was included as a covariate in the determination of DEGs. HPV-positive cases were excluded.

*Available for separate download.*

**Supplementary Table 7.** List of differentially expressed genes in LUSC, comparing smoking-low to smoking-high tumors with FDR-adjusted p-value <.1. A positive fold change indicates upregulation in smoking-low tumors.

*Available for separate download.*

**Supplementary Table 8.** List of signaling pathways enriched in DEGs in HNSC, as determined by Ingenuity Pathway Analysis, and expressed with  $-\log$  p-value, directional z-score (where available), and ratio of DEGs in the named pathway.

*Available for separate download.*

**Supplementary Table 9.** List of signaling pathways enriched in DEGs in LUSC, as determined by Ingenuity Pathway Analysis, and expressed with  $-\log$  p-value, directional z-score (where available), and ratio of DEGs in the named pathway.

*Available for separate download.*

**Supplementary Table 10.** Differentially expressed genes between smoking-high and smoking-low tumors, with opposite directionality in HNSC vs. LUSC. The gene list has been truncated to those genes with nominal p-value <.1 in at least one cancer type.

*Available for separate download.*



**Supplementary Table 11.** Overlap of differentially regulated genes in Supplementary Table 10 with the gene signatures shown to have predictive utility in anti-PD-1 treated patients in Ayers et al (3).

---

| <b>IFN gamma signature (4/6)</b> |
|----------------------------------|
| <u>IDO1</u>                      |
| <u>CXCL10</u>                    |
| <u>CXCL9</u>                     |
| <u>HLA-DRA</u>                   |
| <u>STAT1</u>                     |
| <u>IFNG</u>                      |

---

| <b>Expanded immune gene signature (T cell inflamed) (5/18)</b> |
|----------------------------------------------------------------|
| <u>CD3D</u>                                                    |
| <u>IDO1</u>                                                    |
| <u>CIITA</u>                                                   |
| <u>CD3E</u>                                                    |
| <u>CCL5</u>                                                    |
| <u>GZMK</u>                                                    |
| <u>CD2</u>                                                     |
| <u>HLA-DRA</u>                                                 |
| <u>CXCL13</u>                                                  |
| <u>IL2RG</u>                                                   |
| <u>NKG7</u>                                                    |
| <u>HLA-E</u>                                                   |
| <u>CXCR6</u>                                                   |
| <u>LAG3</u>                                                    |
| <u>TAGAP</u>                                                   |
| <u>CXCL10</u>                                                  |
| <u>STAT1</u>                                                   |
| <u>GZMB</u>                                                    |

---

**Supplementary Table 12.** Clinical response data in head and neck squamous cell carcinoma patients: 81 patients treated at MSKCC with anti-PD-1 or anti-PD-L1 drugs, with minimum 6 month follow-up.

| Response                       | Clinical smoking history |              | CB rate    |               | P*  |
|--------------------------------|--------------------------|--------------|------------|---------------|-----|
|                                | No. of Former            | No. of Never | Smokers, % | Nonsmokers, % |     |
| All HNSC patients (n=81)       |                          |              | 33.3       | 57.1          | .03 |
| Clinical benefit (CR/PR or SD) | 18                       | 16           |            |               |     |
| No clinical benefit (POD)      | 36                       | 12           |            |               |     |
| HPV-negative patients (n=43)   |                          |              | 25.6       | 66.7          | .02 |
| Clinical benefit (CR/PR or SD) | 8                        | 8            |            |               |     |
| No clinical benefit (POD)      | 23                       | 4            |            |               |     |
| HPV-positive patients (n=38)   |                          |              | 43.4       | 50.6          | .47 |
| Clinical benefit (CR/PR or SD) | 10                       | 8            |            |               |     |
| No clinical benefit (POD)      | 13                       | 8            |            |               |     |

\* Fisher exact test, single-tailed

HNSC, head and neck squamous cell carcinoma

HPV, human papillomavirus

CB, clinical benefit; CR, complete response; PR, partial response; POD, progression of disease

## REFERENCES

1. Walter V, Yin X, Wilkerson MD, et al. Molecular subtypes in head and neck cancer exhibit distinct patterns of chromosomal gain and loss of canonical cancer genes. *PLoS one*. 2013;8(2):e56823.
2. Lee ES, Son DS, Kim SH, et al. Prediction of recurrence-free survival in postoperative non-small cell lung cancer patients by using an integrated model of clinical information and gene expression. *Clinical cancer research : an official journal of the American Association for Cancer Research*. 2008;14(22):7397-7404.
3. Ayers M, Lunceford J, Nebozhyn M, et al. IFN-gamma-related mRNA profile predicts clinical response to PD-1 blockade. *The Journal of clinical investigation*. 2017;127(8):2930-2940.
4. McShane LM, Altman DG, Sauerbrei W, et al. Reporting recommendations for tumor marker prognostic studies (REMARK). *J Natl Cancer Inst*. 2005;97(16):1180-1184.
